# Supplementary material for: Divergent MLS1 Promoters Lie on a Fitness Plateau for Gene Expression
Source: PubMed Central journal article supplement (PMC4839218; doi:10.1093/molbev/msw010), 2016-01-18
Supplement: supp_msw010_Supporting_Info_Dec9_Revision.pdf [file supp_msw010_Supporting_Info_Dec9_Revision.pdf]

## Supporting Information

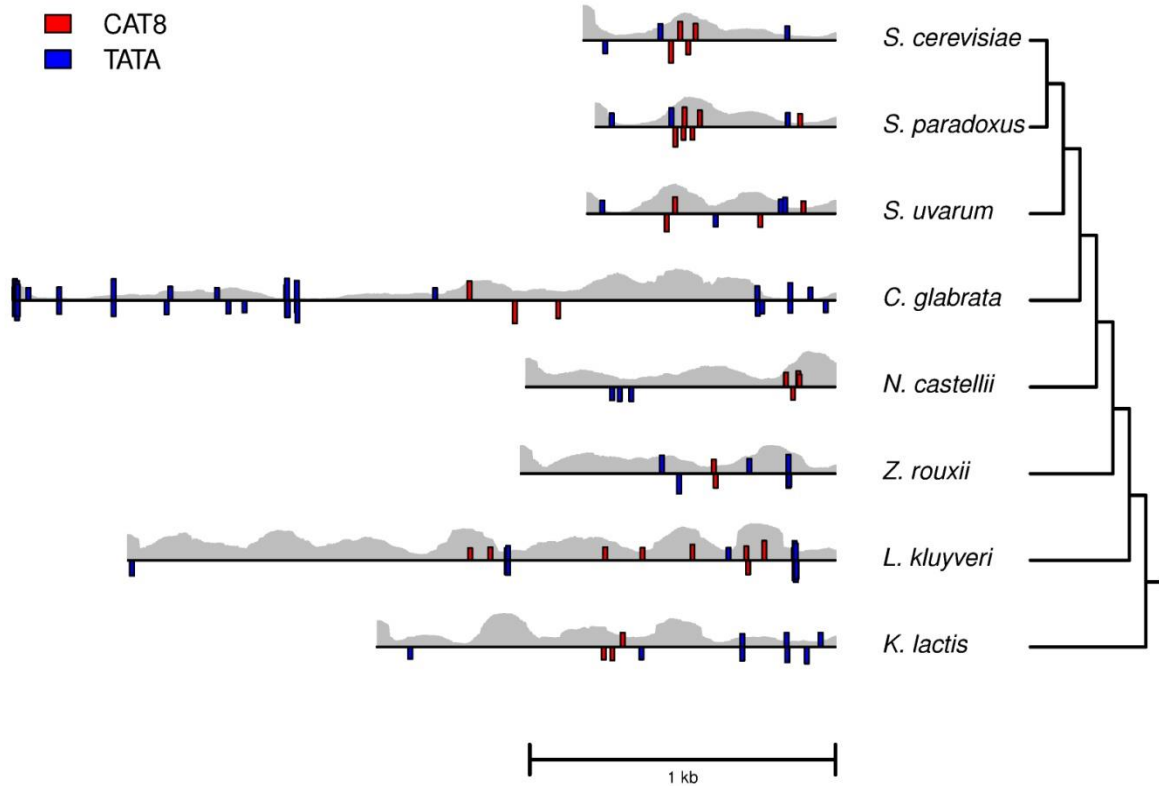

**Figure S1. Transcription factor binding and nucleosome occupancy predictions for *MLS1* promoters.** The noncoding region upstream of *MLS1* from eight yeast species, where the heights of colored bars represent the scores of predicted binding sites for Cat8 and TATA. Bars above each line represent sites on the forward strand and those below represent sites on the reverse strand. The probability of nucleosome occupancy at each base pair along the promoters is represented by the height of the grey bars in the background.

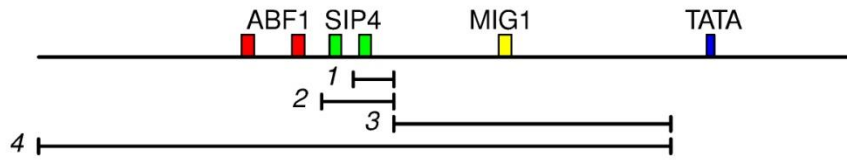

**Figure S2. Regions deleted from the *S. cerevisiae* *MLS1* promoter.** Each bar indicates a deleted region. The deletions are 1) one Sip4/Cat8 binding site 2) two Sip4/Cat8 binding sites 3) the region surrounding the Mig1 binding site and 4) the entire promoter except the basal promoter.

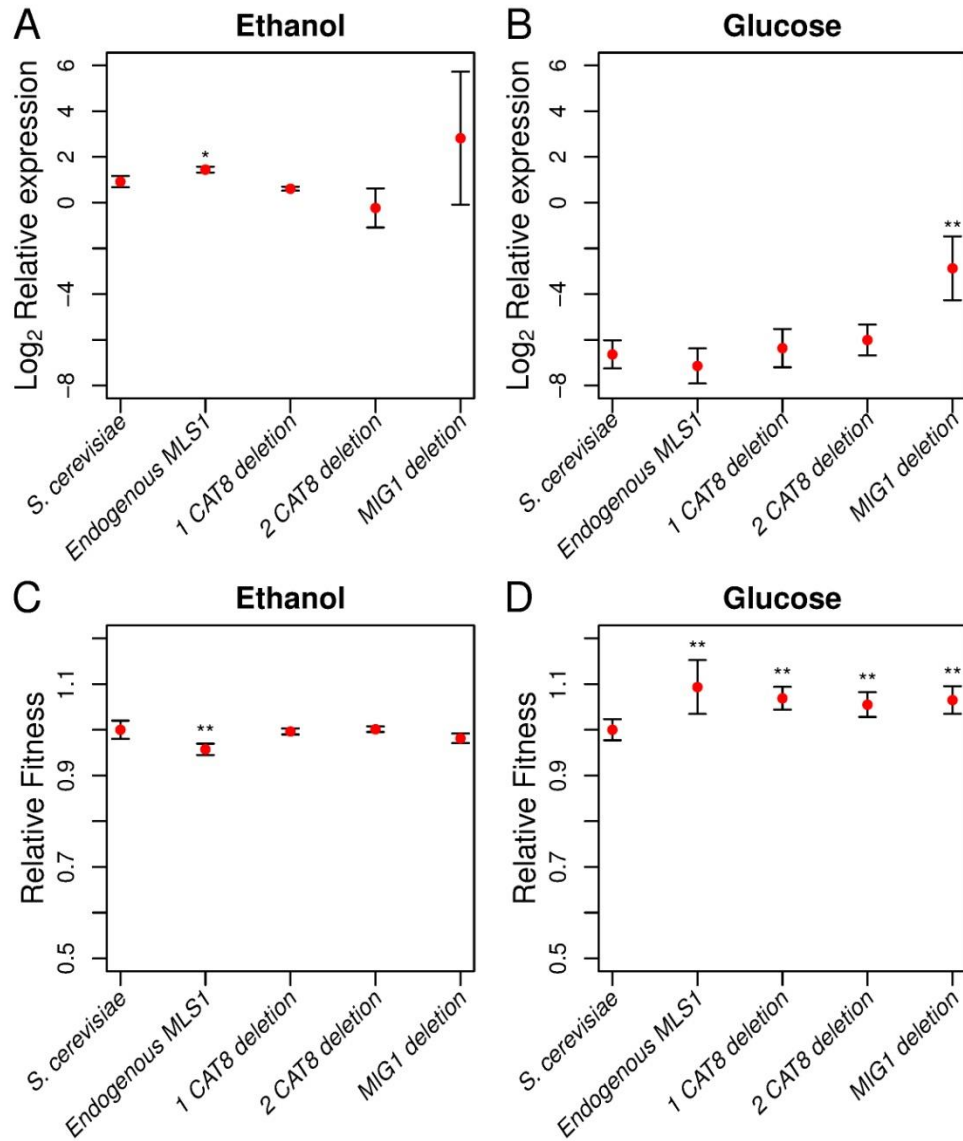

**Figure S3. Gene expression and fitness of *MLS1* deletion promoters in two environments.**

Relative expression shows expression of each *MLS1* promoter construct relative to the housekeeping gene *ACT1* on a log<sub>2</sub> scale in (A) 3% ethanol and (B) 2% glucose. Relative fitness represents the growth rate of each strain relative to a reference competitor strain in (C) 3% ethanol and (D) 2% glucose. Error bars indicate one standard deviation, significant differences in comparison to the wildtype *S. cerevisiae* promoter (*S. cerevisiae*) are shown for P value <0.05 (\*), P<0.01 (\*\*) and P<0.001 (\*\*\*). For reference, *MLS1* expression and fitness are also shown from its endogenous locus (Endogenous *MLS1*).

## Relationship between *MLS1* expression and fitness

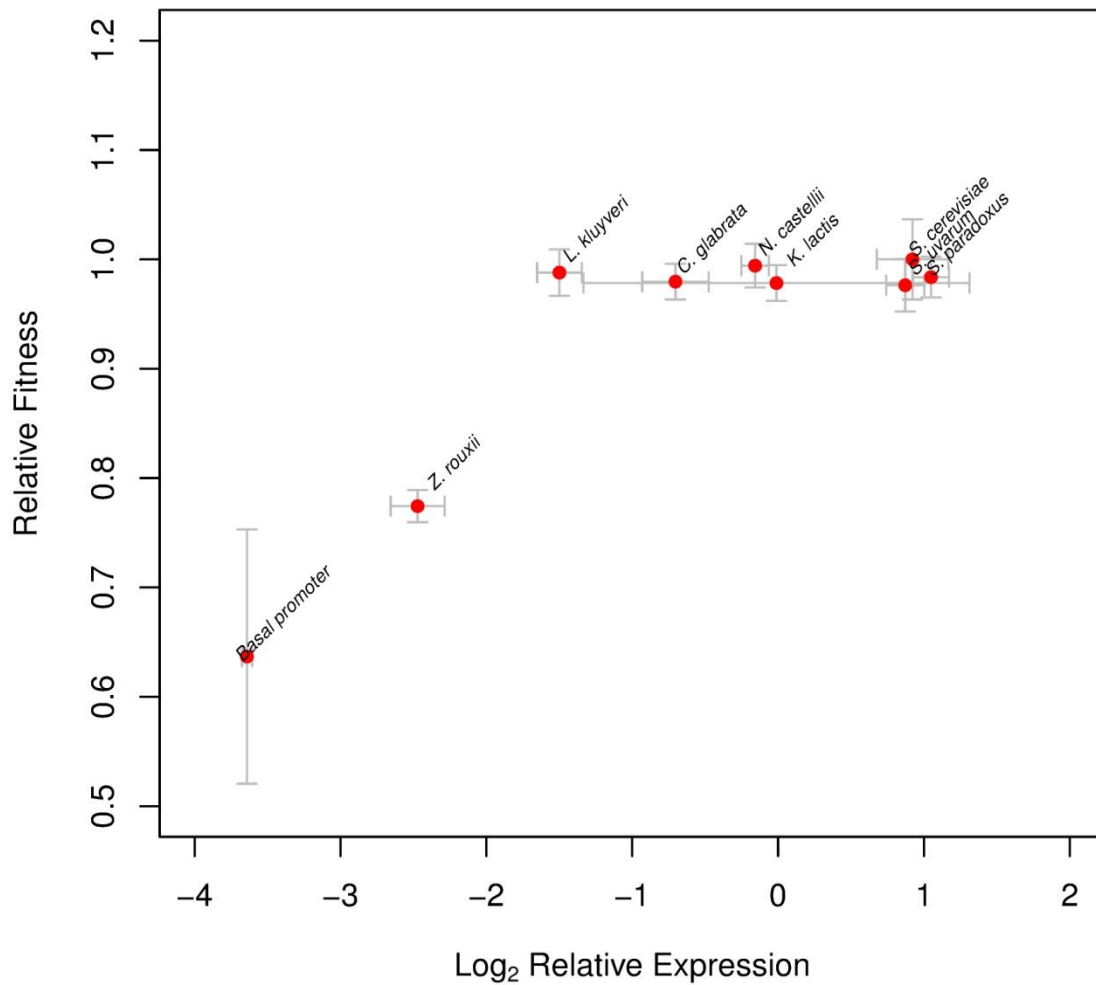

**Figure S4. Relationship between *MLS1* gene expression and fitness in ethanol.** The fitness data from Figure 2C is plotted against the *MLS1* expression data from Figure 2A. As in Figure 2, relative expression represents expression of each *MLS1* promoter construct relative to the housekeeping gene *ACT1* on a  $\text{log}_2$  scale. Relative fitness represents the growth rate of each strain relative to a reference competitor. Error bars indicate one standard deviation.

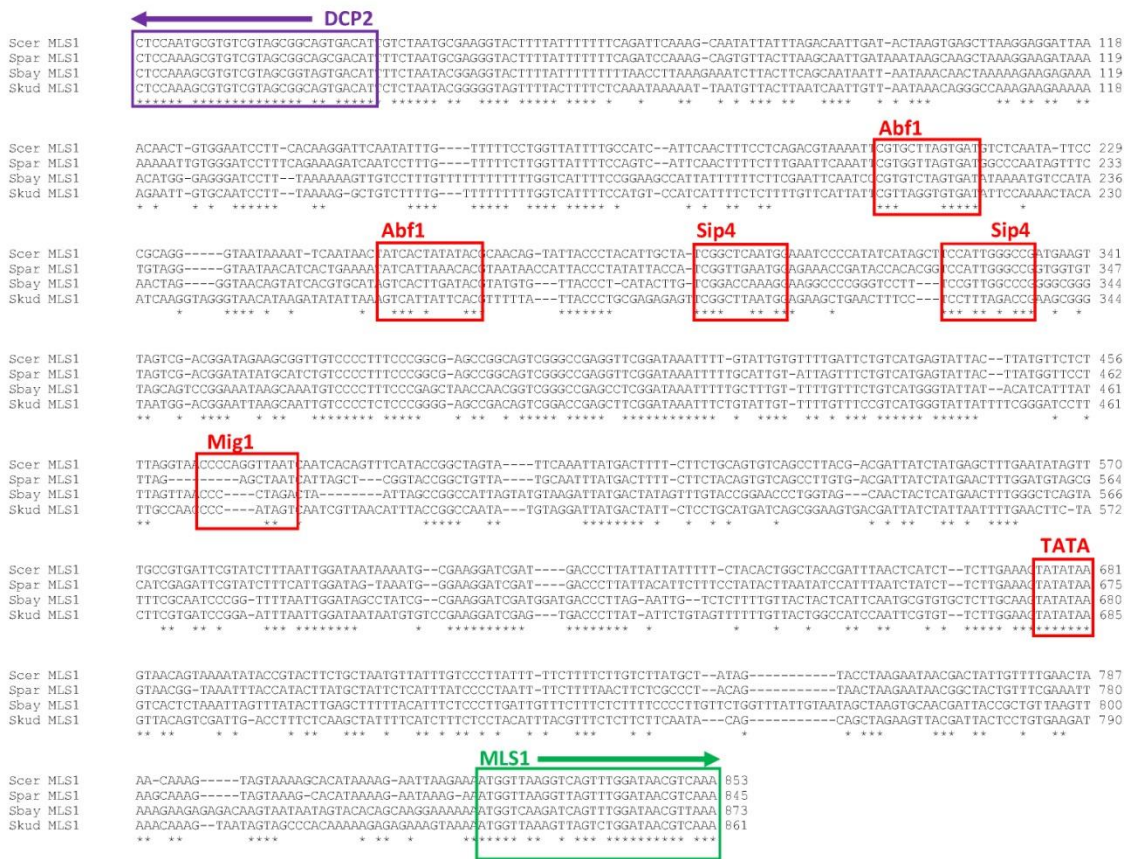

**Figure S5. Alignment of *MLS1* promoter regions among *Saccharomyces sensu stricto* species.** A ClustalW alignment is shown for the *MLS1* promoters for *S. cerevisiae*, *S. paradoxus*, *S. uvarum* and *S. mikatae*. Known binding sites are boxed in red, *MLS1* and *DCP2* coding regions are boxed in green and purple, respectively. Stars indicate sites that are conserved between all four species.

**Table S1. The sum of all position weight matrix scores for each *MLS1* promoter.**

|                      | ABF1 | SIP4 | MIG1 |
|----------------------|------|------|------|
| <i>S. cerevisiae</i> | 23.7 | 24.7 | 11.6 |
| <i>S. paradoxus</i>  | 21.3 | 34.9 | 5.3  |
| <i>S. uvarum</i>     | 25.6 | 19.5 | 10.6 |
| <i>C. glabrata</i>   | 29.2 | 24.2 | 0    |
| <i>N. castellii</i>  | 7.1  | 8.1  | 19.0 |
| <i>Z. rouxii</i>     | 21.5 | 7.9  | 11.6 |
| <i>L. kluyveri</i>   | 33.8 | 18.8 | 16.9 |
| <i>K. lactis</i>     | 9.3  | 8.9  | 5.3  |

Scores represent the sum of all PWM scores above a cutoff of  $\ln(\text{p-value})=-7$ . This cutoff corresponds to scores of 2.427, 0.808, and 5.222 for ABF1, SIP4, and MIG1, respectively.

**Table S2. Single sample Wilcoxon signed-rank test for histone occupancy at binding sites relative to the promoter median histone occupancy.**

| Transcription factor <sup>a</sup> | Alternative hypothesis for binding site occupancy <sup>b</sup> | p-value |
|-----------------------------------|----------------------------------------------------------------|---------|
| Sip4                              | greater than promoter median                                   | 0.0087  |
| Abf1                              | greater than promoter median                                   | 0.016   |
| Mig1                              | greater than promoter median                                   | 0.25    |
| Cat8                              | greater than promoter median                                   | 0.0014  |
| TATA                              | less than promoter median                                      | 0.0013  |

<sup>a</sup> Each transcription factor represents all sites in the five non-*Saccharomyces* species studied.

<sup>b</sup> See the Materials and Methods section for details on the single sample Wilcoxon signed-rank test.

**Table S3. Absolute difference of log<sub>2</sub> relative expression between ethanol and glucose media for each strain.**

|                      | Log <sub>2</sub> relative expression <sup>a</sup> |         | Difference | Glucose to Ethanol                          |
|----------------------|---------------------------------------------------|---------|------------|---------------------------------------------|
|                      | Ethanol                                           | Glucose |            | fold change<br>(non-log <sub>2</sub> scale) |
| <i>S. cerevisiae</i> | 0.92                                              | -6.64   | 7.56       | 188.7                                       |
| <i>S. paradoxus</i>  | 1.05                                              | -6.01   | 7.06       | 133.4                                       |
| <i>S. uvarum</i>     | 0.87                                              | -5.57   | 6.44       | 86.8                                        |
| <i>C. glabrata</i>   | -0.70                                             | -5.17   | 4.46       | 22.0                                        |
| <i>N. castellii</i>  | -0.16                                             | -3.28   | 3.44       | 10.8                                        |
| <i>Z. rouxii</i>     | -2.47                                             | -6.28   | 3.81       | 14.0                                        |
| <i>L. kluyveri</i>   | -1.50                                             | -4.06   | 2.56       | 5.9                                         |
| <i>K. lactis</i>     | -0.01                                             | -5.06   | 5.05       | 33.1                                        |
| basal promoter       | -3.64                                             | -6.92   | 3.28       | 9.7                                         |
| 1 Cat8 deleted       | 0.61                                              | -6.36   | 6.97       | 125.4                                       |
| 2 Cat8 deleted       | -0.23                                             | -6.01   | 5.78       | 54.9                                        |
| Mig1 deleted         | 2.82                                              | -2.87   | 5.69       | 51.6                                        |
| Endogenous<br>MLS1   | 1.45                                              | -7.14   | 8.59       | 385.3                                       |

<sup>a</sup> Relative expression in ethanol and glucose correspond to the mean values shown in Figure 2 and Figure

S3.



**Table S4. Relative log<sub>2</sub> gene expression data from Thompson *et al.* (2013) during the switch from fermentative growth on glucose to aerobic respiration following the diauxic shift for *MLS1*, as well as the transcription factors *CAT8*, *SIP4*, *MIG1*, *ABF1* and the gluconeogenesis genes *MDH2* and *PCK1*.**

| Gene |         | Lag phase | Late Log | Diauxic Shift | Post Shift | Plateau | Fold change (Plateau -Lag) |
|------|---------|-----------|----------|---------------|------------|---------|----------------------------|
| MLS1 | Scer    | 2.196     | 1.128    | 1.641         | 5.649      | 10.106  | 7.910                      |
|      | Spar    | 2.760     | 0.180    | 1.271         | 9.617      | 11.018  | 8.259                      |
|      | Smik    | 0.295     | 0.276    | 0.842         | 4.930      | 8.848   | 8.553                      |
|      | Sbay    | -0.491    | 0.559    | 2.584         | 3.092      | 3.188   | 3.678                      |
|      | Sbay.uv | 1.219     | 0.419    | 1.890         | 0.517      | 6.916   | 5.697                      |
|      | Cgla    | 0.053     | 0.876    | 2.440         | 5.288      | 4.670   | 4.617                      |
|      | Ncas    | 0.750     | -0.177   | -0.103        | -0.172     | 0.915   | 0.165                      |
|      | Kpol    | 3.533     | 5.858    | 8.147         | 9.578      | 11.270  | 7.737                      |
|      | Kwal    | 1.968     | -0.145   | 0.863         | 2.652      | 6.448   | 4.480                      |
|      | Lklu    | 1.955     | 1.100    | 1.931         | 5.161      | 5.654   | 3.699                      |
|      | Klac    | 0.458     | 0.202    | 2.552         | 3.756      | 5.986   | 5.527                      |
|      | Calb    | -2.028    | 2.589    | 4.641         | 5.321      | 6.212   | 8.240                      |
|      | Ylip    | -4.114    | -1.290   | 2.486         | 2.775      | 3.310   | 7.424                      |
| CAT8 | Scer    | 1.141     | 1.201    | 3.790         | 6.561      | 5.787   | 4.646                      |
|      | Spar    | -0.172    | 1.760    | 5.260         | 5.497      | 5.349   | 5.520                      |
|      | Smik    | -1.323    | 4.192    | 4.792         | 5.621      | 5.711   | 7.035                      |
|      | Sbay    | 3.330     | 1.796    | 5.061         | 5.483      | 5.583   | 2.253                      |
|      | Sbay.uv | -0.158    | 1.167    | 2.825         | 1.938      | 3.735   | 3.892                      |
|      | Cgla    | -0.530    | 1.025    | 2.074         | 5.048      | 3.397   | 3.927                      |
|      | Ncas    | 3.241     | -0.117   | 4.103         | 4.840      | 5.692   | 2.451                      |
|      | Kpol    | NA        | NA       | NA            | NA         | NA      |                            |
|      | Kwal    | -0.153    | 0.296    | 1.025         | 1.512      | 2.051   | 2.204                      |
|      | Lklu    | -0.238    | 0.207    | 1.975         | 2.036      | 1.771   | 2.009                      |
|      | Klac    | 1.123     | 0.413    | 0.683         | 0.823      | 0.952   | -0.171                     |
|      | Calb    | 0.811     | 3.385    | 1.681         | 2.119      | 1.940   | 1.129                      |
|      | Ylip    | NA        | NA       | NA            | NA         | NA      |                            |
| SIP4 | Scer    | 2.564     | -0.177   | 0.531         | 6.935      | 8.104   | 5.541                      |
|      | Spar    | 1.195     | 0.059    | 1.138         | 7.975      | 7.809   | 6.615                      |
|      | Smik    | 2.997     | 2.365    | 3.603         | 6.179      | 7.148   | 4.151                      |
|      | Sbay    | -0.624    | -1.319   | -0.144        | 0.189      | 0.064   | 0.687                      |
|      | Sbay.uv | 2.211     | -0.124   | 0.202         | -0.124     | 2.673   | 0.462                      |
|      | Cgla    | 1.271     | -0.155   | 0.174         | 4.832      | 3.195   | 1.925                      |
|      | Ncas    | 0.861     | 1.323    | 1.007         | 0.164      | 4.162   | 3.301                      |
|      | Kpol    | 1.331     | 1.239    | 5.427         | 8.545      | 7.554   | 6.223                      |

|      |         |        |        |        |        |        |        |
|------|---------|--------|--------|--------|--------|--------|--------|
|      | Kwal    | 3.087  | 0.310  | 3.396  | 7.702  | 8.797  | 5.710  |
|      | Lklu    | 3.324  | -0.060 | 5.113  | 7.813  | 7.148  | 3.824  |
|      | Klac    | 2.369  | -0.435 | 2.318  | 4.779  | 5.919  | 3.551  |
|      | Calb    | NA     | NA     | NA     | NA     | NA     |        |
|      | Ylip    | NA     | NA     | NA     | NA     | NA     |        |
| MIG1 | Scer    | 1.001  | -0.337 | -0.254 | -1.596 | -1.906 | -2.906 |
|      | Spar    | 0.664  | 0.076  | -1.122 | -2.624 | -2.659 | -3.323 |
|      | Smik    | 0.818  | -0.729 | -0.682 | -1.366 | -2.933 | -3.751 |
|      | Sbay    | 0.905  | 0.157  | -0.350 | -0.495 | -0.650 | -1.555 |
|      | Sbay.uv | 1.066  | -0.377 | -0.615 | -0.608 | -1.948 | -3.014 |
|      | Cgla    | 1.985  | 0.236  | -0.045 | -1.897 | -1.131 | -3.116 |
|      | Ncas    | -0.122 | 0.067  | -0.379 | -0.022 | 0.891  | 1.013  |
|      | Kpol    | NA     | NA     | NA     | NA     | NA     |        |
|      | Kwal    | 0.466  | 0.515  | 1.518  | 1.533  | 1.849  | 1.383  |
|      | Lklu    | 1.181  | -0.025 | 0.686  | 0.951  | 1.648  | 0.467  |
|      | Klac    | -1.676 | -0.587 | -0.328 | -0.660 | -0.060 | 1.616  |
|      | Calb    | -0.537 | 0.103  | 1.228  | 1.523  | 1.421  | 1.958  |
|      | Ylip    | 0.938  | 0.086  | 2.681  | 2.301  | 2.118  | 1.180  |
| ABF1 | Scer    | 0.914  | -0.441 | -0.512 | -2.791 | -1.765 | -2.678 |
|      | Spar    | 0.717  | -0.126 | -1.419 | -1.268 | -0.992 | -1.708 |
|      | Smik    | 1.025  | -0.762 | -0.852 | -1.175 | -0.838 | -1.863 |
|      | Sbay    | 0.119  | -0.291 | -0.824 | -1.258 | -1.629 | -1.747 |
|      | Sbay.uv | -0.236 | -0.262 | -0.335 | -0.251 | -1.021 | -0.785 |
|      | Cgla    | NA     | NA     | NA     | NA     | NA     |        |
|      | Ncas    | -0.141 | 0.084  | -0.510 | -1.243 | -1.248 | -1.107 |
|      | Kpol    | -0.056 | -0.577 | -0.184 | -0.818 | -0.563 | -0.507 |
|      | Kwal    | 0.255  | 0.918  | 1.156  | 1.967  | 0.457  | 0.202  |
|      | Lklu    | 0.158  | -0.073 | -0.310 | -0.088 | -0.621 | -0.779 |
|      | Klac    | 1.365  | -0.366 | -1.285 | -1.431 | -0.994 | -2.359 |
|      | Calb    | NA     | NA     | NA     | NA     | NA     |        |
|      | Ylip    | NA     | NA     | NA     | NA     | NA     |        |
| MDH2 | Scer    | 0.774  | 1.683  | 2.256  | 5.255  | 7.261  | 6.488  |
|      | Spar    | 2.034  | 1.509  | 3.555  | 6.713  | 7.374  | 5.340  |
|      | Smik    | 1.482  | 0.614  | 1.318  | 2.363  | 5.592  | 4.110  |
|      | Sbay    | 1.062  | 0.339  | 2.055  | 2.201  | 1.903  | 0.841  |
|      | Sbay.uv | 0.936  | 0.202  | 1.524  | 0.625  | 2.487  | 1.550  |
|      | Cgla    | 2.562  | 0.734  | 2.187  | 4.212  | 3.302  | 0.740  |
|      | Ncas    | 1.710  | -0.116 | 0.628  | 1.330  | 2.964  | 1.254  |
|      | Kpol    | 0.830  | 0.231  | 1.218  | 2.483  | 3.639  | 2.809  |

|      |         |        |        |        |        |        |        |
|------|---------|--------|--------|--------|--------|--------|--------|
|      | Kwal    | 1.850  | 0.651  | 4.065  | 5.986  | 5.786  | 3.936  |
|      | Lklu    | -1.659 | -0.697 | 0.887  | 1.692  | 0.653  | 2.312  |
|      | Klac    | -3.018 | -1.634 | -1.722 | -1.896 | -3.224 | -0.206 |
|      | Calb    | -5.761 | 0.847  | 2.206  | 3.760  | 3.808  | 9.568  |
|      | Ylip    | -3.253 | 0.382  | -0.387 | 0.727  | 1.218  | 4.471  |
| PCK1 | Scer    | 4.994  | 0.493  | 0.871  | 7.704  | 12.214 | 7.220  |
|      | Spar    | 3.733  | 0.190  | 0.358  | 10.540 | 10.716 | 6.983  |
|      | Smik    | 1.221  | 0.487  | 2.024  | 7.149  | 12.139 | 10.918 |
|      | Sbay    | 1.802  | 0.084  | 1.325  | 2.207  | 3.150  | 1.348  |
|      | Sbay.uv | 5.536  | -0.757 | 1.300  | -0.381 | 8.178  | 2.643  |
|      | Cgla    | 5.140  | 0.550  | 2.243  | 6.621  | 8.749  | 3.608  |
|      | Ncas    | 0.487  | 1.425  | 1.501  | 1.825  | 4.292  | 3.805  |
|      | Kpol    | 3.256  | 3.341  | 7.310  | 9.728  | 11.625 | 8.369  |
|      | Kwal    | 4.345  | -0.285 | 1.305  | 5.097  | 9.251  | 4.906  |
|      | Lklu    | 3.459  | -0.443 | 1.593  | 7.657  | 8.870  | 5.411  |
|      | Klac    | -0.622 | -0.125 | 1.887  | 4.669  | 7.978  | 8.600  |
|      | Calb    | 1.933  | 0.842  | 3.453  | 5.394  | 9.736  | 7.804  |
|      | Ylip    | -3.644 | 1.534  | 3.200  | 2.192  | 3.057  | 6.701  |

---

**Table S5. Heterologous *MLS1* promoter expression fold change (log<sub>2</sub> scale) from glucose to ethanol compared to endogenous *MLS1* expression fold change for each species before and after the diauxic shift.**

| Species              | Heterologous <i>MLS1</i><br>Ethanol – Glucose fold change<br>(from Table S3) | Endogenous <i>MLS1</i><br>Plateau – Lag phase fold change <sup>a</sup><br>(from Table S4) |
|----------------------|------------------------------------------------------------------------------|-------------------------------------------------------------------------------------------|
| <i>S. cerevisiae</i> | 7.56                                                                         | 7.91                                                                                      |
| <i>S. paradoxus</i>  | 7.06                                                                         | 8.26                                                                                      |
| <i>S. uvarum</i>     | 6.44                                                                         | 5.70                                                                                      |
| <i>C. glabrata</i>   | 4.46                                                                         | 4.62                                                                                      |
| <i>N. castellii</i>  | 3.44                                                                         | 0.16                                                                                      |
| <i>L. kluyveri</i>   | 2.56                                                                         | 3.70                                                                                      |
| <i>K. lactis</i>     | 5.05                                                                         | 5.53                                                                                      |

<sup>a</sup> Data for endogenous species are from Thompson *et al.* (2013). A linear regression of heterologous against endogenous *MLS1* fold changes gives an R<sup>2</sup> of 0.86. This regression excludes *N. castellii*, which did not appear to undergo a diauxic shift in Thompson *et al.* (2013).

**Tables S6. P-values for differences in relative expression changes of *MLS1* over time compared to *S. cerevisiae* in the dynamic conditions of a switch from glucose to ethanol media.**

| Species             | P-value for difference in rate of expression change<br>between time points compared to <i>S. cerevisiae</i> <sup>a,b</sup> |                 |                 |                        |
|---------------------|----------------------------------------------------------------------------------------------------------------------------|-----------------|-----------------|------------------------|
|                     | 0-15 min                                                                                                                   | 15-30 min       | 30-60 min       | 60 min -<br>acclimated |
| <i>S. paradoxus</i> | 0.851578                                                                                                                   | 0.738449        | 0.769555        | 0.736689               |
| <i>S. uvarum</i>    | 0.808782                                                                                                                   | 0.903919        | 0.721583        | 0.845463               |
| <i>C. glabrata</i>  | <b>3.50E-05</b>                                                                                                            | 0.869589        | 0.632714        | 0.372738               |
| <i>N. castellii</i> | <b>0.035878</b>                                                                                                            | 0.189823        | <b>0.02019</b>  | 0.950338               |
| <i>Z. rouxii</i>    | <b>0.030106</b>                                                                                                            | <b>0.002798</b> | 0.14618         | 0.535873               |
| <i>L. kluyveri</i>  | <b>0.000262</b>                                                                                                            | <b>0.013679</b> | 0.637005        | 0.947954               |
| <i>K. lactis</i>    | <b>0.004283</b>                                                                                                            | 0.366194        | <b>0.003081</b> | 0.051127               |

<sup>a</sup> Expression levels correspond to those shown in Figure 3A-C.

<sup>b</sup> The p-values shown are based on nested ANOVA where level~( timepoint/species), meaning that the expression level is a function of each species nested within each time point.

**Tables S7. Significant p-values for differences in relative expression levels of *MLS1* in the dynamic conditions of a switch from glucose to ethanol media.**

| Species             | P-value for difference in mean expression at each time point compared to <i>S. cerevisiae</i> <sup>a,b</sup> |                 |                 |                 |                 |
|---------------------|--------------------------------------------------------------------------------------------------------------|-----------------|-----------------|-----------------|-----------------|
|                     | 0                                                                                                            | 15              | 30              | 60              | acclimated      |
| <i>S. paradoxus</i> | 0.452715                                                                                                     | 0.262391        | 0.29149         | 0.367349        | 0.579637        |
| <i>S. uvarum</i>    | 0.200703                                                                                                     | 0.23182         | 0.275625        | 0.16118         | 0.285453        |
| <i>C. glabrata</i>  | 0.079131                                                                                                     | <b>0.024743</b> | <b>0.035229</b> | <b>0.012049</b> | 0.052946        |
| <i>N. castellii</i> | <b>1.59E-06</b>                                                                                              | 0.077563        | 0.539669        | 0.14049         | 0.096974        |
| <i>Z. rouxii</i>    | 0.670524                                                                                                     | 0.166198        | <b>7.47E-05</b> | <b>0.005469</b> | <b>0.000116</b> |
| <i>L. kluyveri</i>  | <b>0.002509</b>                                                                                              | 0.500891        | <b>0.004454</b> | <b>0.014309</b> | <b>0.004374</b> |
| <i>K. lactis</i>    | 0.059916                                                                                                     | 0.2965          | 0.067079        | 0.390145        | 0.26356         |

<sup>a</sup> Expression levels correspond to those shown in Figure 3A-C.

<sup>b</sup> The p-values shown are based on nested ANOVA where level~( timepoint/species), meaning that the expression level is a function of each species nested within each time point.

**Table S8. Yeast species strains used for genomic DNA.**

| Strain       | Species              | Source      | Size of region used (bp) |
|--------------|----------------------|-------------|--------------------------|
| S288C        | <i>S. cerevisiae</i> | D. Botstein | 825                      |
| NRRL Y-17217 | <i>S. paradoxus</i>  | E. Lewis    | 785                      |
| MCYC623      | <i>S. uvarum</i>     | E. Lewis    | 813                      |
| NRRL Y-65    | <i>C. glabrata</i>   | C. Kurtzman | 2683                     |
| FM476        | <i>N. castellii</i>  | M. Johnston | 1013                     |
| NRRL Y-229   | <i>Z. rouxii</i>     | C. Kurtzman | 1030                     |
| FM479        | <i>S. kluyveri</i>   | M. Johnston | 2315                     |
| FM423        | <i>K. lactis</i>     | M. Johnston | 1501                     |

## File S1

### List of Primers

#### Primers targeting yeast species genomic DNA

The following the genomic regions and primers were used for each species. For the *S. cerevisiae*, bold indicates the XmaI restriction site attached to primers. For all other species, bold indicates regions with homology to the pRS306 plasmid (forward) and the the beginning of the *S. cerevisiae* *MLS1* coding region (reverse).

#### *Saccharomyces cerevisiae* S288c chromosome XIV

Accession number: BK006947

Coordinates: 405533-408327 (length: 2795 bp)

Forward: ATATAT**CCCGGG**TTCTCCAATGCGTGTCTGTAG

Reverse: ATATAT**CCCGGG**CCTTTGCTGAAAGCTTCAAACG

#### *Saccharomyces paradoxus* NRRL Y-17217 contig\_246

Accession number: AABY01000166

Coordinates 17189-17973 (length: 785 bp)

Forward: **TCTAGA**ACTAGTGGAT**CCCCCGGG**TTTCTAATGCGAGGGTACTTTTTATTTTTTTC

Reverse: **CGTTATCCAA**ACTGACCTTA**ACC**ATTTCTTTATTCTTTTATGTGCTTTACTACTTTGC

#### *Zygosaccharomyces rouxii* (strain CBS732)

Accession number CU928174

Coordinates 1321964-1322993 (length: 1030 bp)

Forward: **TCTAGA**ACTAGTGGAT**CCCCCGGG**CAGGGTTTTAACCCCGAAAAAC

Reverse: **CGTTATCCAA**ACTGACCTTA**ACC**ATGATTAACCGATAAAAAATGTAATTTTC.

#### *Naumovozya castellii* NRRL Y-12630 YM476-Contig666

Accession number AACF01000050

Coordinates 31280- 32292 (length: 1013 bp)

Forward: **TCTAGA**ACTAGTGGAT**CCCCCGGG**GGTGACCAGCTAATAAAGAATC

Reverse: **CGTTATCCAA**ACTGACCTTA**ACC**ATTGTGGTTGTGGTTGTGTTTG

#### *Lachancea kluyveri* NRRL Y-12651 chromosome E

Accession number: CM000691 AACE03000000

Coordinates: 906302-908617 (length: 2316)

Forward: **TCTAGA**ACTAGTGGAT**CCCCCGGG**TGGCTGGATATTACCAATTTTAATATTTTG

Reverse: **CGTTATCCAA**ACTGACCTTA**ACC**ATTTTTGAATATGTGAAATTGCGTCTTAG

#### *Kluyveromyces lactis* strain NRRL Y-1140 chromosome F

Accession number: CR382126

Coordinates: 2233682- 2235182 (length: 1501)

Forward: **TCTAGA**ACTAGTGGAT**CCCCCGGG**ATTTTCAGTCTAATTTAAATGGTTAATGGTAC

Reverse: **CGTTATCCAA**ACTGACCTTA**ACC**ATGATGAATCTTTAATAAAAGTTTTCTGATAGTAG

#### *Saccharomyces uvarum* MCYC 623 contig\_517

Accession number AACA01000260

Coordinates 1689-2501 (length 813)

Forward: **CTAGA**ACTAGTGGAT**CCCCCGGG**TTTCTAATACGGAGGTACTTTTTATTTTTTTTTTAACC

Reverse: **CGTTATCCAA**ACTGACCTTA**ACC**ATTTTTTCTTGCTGTGACTATTACTTTG

#### *Candida glabrata* CCTCC M202019 unplaced genomic scaffold CGRCMSCAFFOLD\_1

Accession number: KI545896

Coordinates: 441629-444311 (length 2683)

Forward: **TCTAGA**ACTAGTGGAT**CCCCCGGG**GTCTTCAATATATTATATATATATCTGCCTTTATC



Reverse: **CGTTATCCAAACTGACCTTAACCATTTTTTTAGTTTGCTATCTTTATGTTAATTTTGG**

**Primers targeting pRS306-ScMLS1**

For Gibson Assembly (New England Biolabs) the pRS306-ScMLS1 plasmid was amplified using the primers:

Forward: **ATGGTTAAGGTCAGTTTGGATAACGTC** (start of the *S. cerevisiae* *MLS1* coding region)

Reverse: **CCCGGGGGATCCACTAGTTCTAG** (pRS306 plasmid region 5' of the site of insertion of the *S. cerevisiae* *MLS1* region)

**MLS1 promoter deletion primers**

The following primers were used to create plasmids with regions of the *S. cerevisiae* *MLS1* promoter deleted. These primers amplified the entire pRS306-ScMLS1 plasmids (except for regions in between the reverse and forward primers that contained the region to be deleted).

For creating a plasmid with 1 Cat8 site removed (Cat8 site closest to the promoter):

Forward: **TTTTTTAGATCTGCGGTTGTCCCCTTTCCCGG**

Reverse: **TTTTTTAGATCTGATATGGGGATTTCCATTGAGCCG.**

Both Cat8 sites deleted:

Forward: **TTTTTTAGATCTGCGGTTGTCCCCTTTCCCGG**

Reverse: **TTTTTTAGATCTGTAGGGTAATACTGTTGCGTATATAGTG**

Mig1 region deleted:

Forward: **TTTTTTAGATCTCTACTGGCTACCGATTTAACTCATCTTC**

Reverse: **TTTTTTAGATCTCCGGGAAAGGGGACAACCGC**

Entire promoter deleted excepted the basal promoter:

Forward: **TTTTTTAGATCTCTACTGGCTACCGATTTAACTCATCTTC**

Reverse: **TTTTTTAGATCTGGCAAAATAACCAGGAAAAACAAATATTG**
